# Supplementary material
Source: PubMed Central journal article supplement (PMC2743446)
Supplement: dep228_1.pdf [file dep228_1.pdf]

**Web Video-1:** *In vitro Growth Human Follicle with Antral Cavity*

**Web Video-2:** *Transzonal Projections in Immature in vivo Human Follicles*

F-Actin (red), Nuclei (blue). Movies were made on Volocity (Improvision/PerkinElmer).

<http://oncofertility.northwestern.edu/research/human-follicle-maturation-in-vitro/shared-files>
